# Supplementary material
Source: PubMed Central journal article supplement (PMC7736419)
Supplement: 12250_2020_233_MOESM1_ESM.pdf [file 12250_2020_233_MOESM1_ESM.pdf]

## Electronic Supplementary Material

### Recombination of T4-like Phages and Its Activity against Pathogenic *Escherichia coli* in Planktonic and Biofilm Forms

Min Li<sup>1,2,3</sup> • Donglin Shi<sup>1,2,3</sup> • Yanxiu Li<sup>1,2,3</sup> • Yuyi Xiao<sup>1,2,3</sup> • Mianmian Chen<sup>1,4</sup> • Liang Chen<sup>5</sup> • Hong Du<sup>6</sup>✉ • Wei Zhang<sup>1,2,3</sup>✉

1. College of Veterinary Medicine, Nanjing Agricultural University, Nanjing 210095, China

2. Key Lab of Animal Bacteriology, Ministry of Agriculture, Nanjing 210095, China

3. Joint laboratory of international cooperation on animal health and food safety, ministry of education

4. Department of Veterinary Medicine, College of Animal Science and Technology, Zhejiang A&F University, Lin'an, Hangzhou 311300, China

5. Hackensack-Meridian Health Center for Discovery and Innovation, Nutley, New Jersey 07110, USA

6. Department of Clinical Laboratory, the Second Affiliated Hospital of Soochow University, Suzhou 215004, China

Supporting information to DOI: 10.1007/s12250-020-00233-2

**Table S1.** strains used in phage reproduction and host range analysis of recombinant phages.

| Strains | WG01 | QL01 | WGqlae | Wgqlbe | Wgqlce | Wgqlde |
|---------|------|------|--------|--------|--------|--------|
| DE001   | 0    | 1    | 0      | 0      | 0      | 0      |
| DE003   | 0    | 1    | 1      | 1      | 1      | 1      |
| DE008   | 0    | 1    | 0      | 1      | 1      | 1      |
| DE011   | 0    | 0    | 1      | 1      | 1      | 1      |
| DE015   | 0    | 1    | 1      | 1      | 1      | 1      |
| DE017   | 1    | 1    | 1      | 1      | 1      | 1      |
| DE018   | 0    | 0    | 1      | 1      | 0      | 1      |
| DE021   | 1    | 1    | 1      | 1      | 1      | 1      |
| DE023   | 0    | 1    | 1      | 1      | 1      | 1      |
| DE028   | 0    | 1    | 1      | 1      | 1      | 1      |
| DE032   | 0    | 1    | 1      | 1      | 1      | 1      |
| DE034   | 1    | 0    | 0      | 1      | 1      | 1      |
| DE037   | 0    | 0    | 1      | 1      | 1      | 1      |
| DE046   | 0    | 0    | 0      | 0      | 0      | 0      |
| DE044   | 1    | 0    | 1      | 1      | 1      | 1      |
| DE061   | 0    | 0    | 1      | 1      | 0      | 1      |
| DE069   | 1    | 0    | 0      | 1      | 1      | 1      |
| DE072   | 1    | 1    | 1      | 1      | 1      | 1      |
| DE075   | 0    | 0    | 1      | 1      | 1      | 1      |
| DE077   | 0    | 0    | 1      | 1      | 1      | 1      |
| DE085   | 0    | 0    | 0      | 0      | 0      | 0      |
| DE101   | 0    | 1    | 0      | 0      | 0      | 0      |
| DE102   | 1    | 1    | 1      | 1      | 1      | 1      |
| DE104   | 0    | 1    | 1      | 1      | 1      | 1      |
| DE119   | 0    | 1    | 0      | 1      | 1      | 0      |
| DE120   | 0    | 1    | 1      | 1      | 1      | 1      |
| DE123   | 0    | 1    | 0      | 1      | 1      | 0      |
| DE147   | 1    | 0    | 0      | 0      | 0      | 0      |
| DE148   | 1    | 1    | 0      | 0      | 0      | 1      |
| DE158   | 1    | 0    | 0      | 1      | 1      | 1      |
| DE160   | 0    | 1    | 1      | 0      | 0      | 1      |
| DE169   | 0    | 1    | 1      | 1      | 1      | 1      |
| DE186   | 0    | 1    | 1      | 1      | 1      | 1      |
| DE192   | 1    | 1    | 1      | 1      | 1      | 1      |
| DE205B  | 0    | 1    | 1      | 1      | 1      | 1      |
| DE217   | 1    | 1    | 0      | 0      | 0      | 0      |
| DE241   | 1    | 0    | 0      | 0      | 0      | 0      |
| DE248   | 0    | 1    | 1      | 1      | 1      | 1      |
| DE278   | 0    | 1    | 1      | 1      | 1      | 1      |
| DE283   | 0    | 1    | 1      | 0      | 1      | 1      |
| DE295   | 0    | 1    | 1      | 1      | 1      | 1      |
| DE296   | 0    | 1    | 1      | 1      | 1      | 1      |
| DE301   | 0    | 1    | 1      | 1      | 1      | 1      |
| DE302   | 0    | 1    | 1      | 1      | 1      | 1      |
| DE303   | 0    | 1    | 1      | 1      | 1      | 1      |
| DE312   | 0    | 1    | 1      | 1      | 1      | 1      |
| DE316   | 0    | 1    | 1      | 1      | 1      | 1      |
| DE322   | 0    | 1    | 1      | 1      | 1      | 1      |
| DE327   | 0    | 1    | 1      | 0      | 1      | 1      |
| DE353   | 1    | 0    | 0      | 0      | 0      | 0      |
| DE365   | 0    | 1    | 1      | 1      | 1      | 1      |
| DE384   | 0    | 1    | 1      | 1      | 1      | 1      |
| DE389   | 0    | 1    | 1      | 1      | 1      | 1      |

|         |   |   |   |   |   |   |
|---------|---|---|---|---|---|---|
| DE400   | 0 | 1 | 1 | 1 | 1 | 1 |
| DE402   | 0 | 1 | 1 | 1 | 1 | 1 |
| DE404   | 0 | 1 | 1 | 1 | 1 | 1 |
| DE407   | 0 | 1 | 1 | 1 | 1 | 1 |
| DE414   | 0 | 1 | 1 | 1 | 1 | 1 |
| DE419   | 0 | 1 | 1 | 1 | 1 | 1 |
| DE452   | 1 | 1 | 0 | 1 | 1 | 0 |
| HX01    | 0 | 1 | 0 | 1 | 1 | 0 |
| NT01    | 1 | 1 | 1 | 0 | 0 | 0 |
| IMT5155 | 1 | 1 | 1 | 0 | 0 | 0 |
| XM      | 1 | 1 | 1 | 1 | 1 | 1 |
| MC1061  | 1 | 0 | 1 | 1 | 1 | 1 |
| RS218   | 1 | 1 | 1 | 1 | 1 | 1 |
| DE002   | 0 | 0 | 0 | 0 | 0 | 0 |
| DE005   | 0 | 0 | 0 | 0 | 0 | 0 |
| DE007   | 0 | 0 | 0 | 0 | 0 | 0 |
| DE010   | 0 | 0 | 0 | 0 | 0 | 0 |
| DE013   | 0 | 0 | 0 | 0 | 0 | 0 |
| DE019   | 0 | 0 | 0 | 0 | 0 | 0 |
| DE020   | 0 | 0 | 0 | 0 | 0 | 0 |
| DE022   | 0 | 0 | 0 | 0 | 0 | 0 |
| DE041   | 0 | 0 | 0 | 0 | 0 | 0 |
| DE049   | 0 | 0 | 0 | 0 | 0 | 0 |
| DE050   | 0 | 0 | 0 | 0 | 0 | 0 |
| DE054   | 0 | 0 | 0 | 0 | 0 | 0 |
| DE056   | 0 | 0 | 0 | 0 | 0 | 0 |
| DE060   | 0 | 0 | 0 | 0 | 0 | 0 |
| DE064   | 0 | 0 | 0 | 0 | 0 | 0 |
| DE065   | 0 | 0 | 0 | 0 | 0 | 0 |
| DE070   | 0 | 0 | 0 | 0 | 0 | 0 |
| DE071   | 0 | 0 | 0 | 0 | 0 | 0 |
| DE074   | 0 | 0 | 0 | 0 | 0 | 0 |
| DE083   | 0 | 0 | 0 | 0 | 0 | 0 |
| DE094   | 0 | 0 | 0 | 0 | 0 | 0 |
| DE098   | 0 | 0 | 0 | 0 | 0 | 0 |
| DE127   | 0 | 0 | 0 | 0 | 0 | 0 |
| DE129   | 0 | 0 | 0 | 0 | 0 | 0 |
| DE132   | 0 | 0 | 0 | 0 | 0 | 0 |
| DE137   | 0 | 0 | 0 | 0 | 0 | 0 |
| DE144   | 0 | 0 | 0 | 0 | 0 | 0 |
| DE167   | 0 | 0 | 0 | 0 | 0 | 0 |
| DE172   | 0 | 0 | 0 | 0 | 0 | 0 |
| DE182   | 0 | 0 | 0 | 0 | 0 | 0 |
| DE183   | 0 | 0 | 0 | 0 | 0 | 0 |
| DE197   | 0 | 0 | 0 | 0 | 0 | 0 |
| DE207   | 0 | 0 | 0 | 0 | 0 | 0 |
| DE209   | 0 | 0 | 0 | 0 | 0 | 0 |
| DE235   | 0 | 0 | 0 | 0 | 0 | 0 |
| DE242   | 0 | 0 | 0 | 0 | 0 | 0 |
| DE257   | 0 | 0 | 0 | 0 | 0 | 0 |
| DE373   | 0 | 0 | 0 | 0 | 0 | 0 |
| DE376   | 0 | 0 | 0 | 0 | 0 | 0 |
| DE388   | 0 | 0 | 0 | 0 | 0 | 0 |
| DE426   | 0 | 0 | 0 | 0 | 0 | 0 |
| DE432   | 0 | 0 | 0 | 0 | 0 | 0 |

|             |    |    |    |    |    |    |
|-------------|----|----|----|----|----|----|
| DE458       | 0  | 0  | 0  | 0  | 0  | 0  |
| DE464       | 0  | 0  | 0  | 0  | 0  | 0  |
| HX04        | 0  | 0  | 0  | 0  | 0  | 0  |
| MG1655      | 0  | 0  | 0  | 0  | 0  | 0  |
| O157:H7     | 0  | 0  | 0  | 0  | 0  | 0  |
| Host ranges | 20 | 50 | 49 | 52 | 52 | 52 |

---

1, clear lysis; 0, no reaction

**Table S2.** The gp37 sequences of chimeric phages. The mutant codons were underlined.**WGqlae**

ATGGCTACTTTAAAGCAAATCCAATTTAAAAGAAGTAAAGTAGCCGGTGTACGT  
 CCGGCACCGGCCAGTTGGCTGAAGGC GAACTGGCTATTA ACTTAAAGGACCGT  
 TACTTTTTACTAAAGACGATACTGGAGCGATTATCGACCTTGGCTTTGCTAAGG  
 GTGGAAATATCGATGGTAATGTTATTCATAAAGGCAATTACAACCAAACCGGCG  
 ATTATACACTTAATGGTGTATTTACTCAAATTGGTGATTTCAATCTCAATGGTATT  
 GCTCGTGTA ACTCGTGACATTATTGCCGCTGGCCAGATAATGACCGAAGGCGGC  
 GAGCTTATTTCTAAGAGCGCCTCAACTTCTCACCTTCGTTTCTTTGATGGTGATGA  
 TCGTGAACGTGGTATTATCTTTTCTCAAATAATGCGGGTCTTACCAATCAAGTA  
 GTTAATATTCGCGTCCAAGATTACGCTGCAGGAAGTGAAAGCACCTACGCGTTTT  
 CAGGCAATGGTGTATTTTCTTCACCAGAAGTTTTTGGGTGGAAATCTGTATCAAC  
 TCCGGTAATTTATACCAATAAAGTTATTACTAATAAAAAGGTAAAGGTGATTAT  
 GACATCTATTCGTTGGCTGACAACACTCCATTTGAAGAAGGCGAAACGGCTATTA  
 ACCACCTCCGTGTTATGCGAAATGCTGTAGGAGCAGGTATTTTCCACGAAGTTAA  
 TGTTAATGACGGAATAACCTGGTATTCCGGAGATGGCTTAGACACTTATCTTTGG  
 TCGTTTAACTGGGCCCGGTGGTTTTCAAGCAGGTCATTCGATTGCAGTAGGTATGG  
 AATCAGGGCCTTTGACATATTCAACCTTAGGTA AAGGTTCTATTGTTCTTGGTGAT  
 AATGATACCGGGTTTAAATGGAAACAAGACGGCCTGTTCTATACAATTAATAATG  
 GAGCTTATACTTTACTTACA ACTCCA ACTGAAGTTACAAGCCTTAAACAGTTAGT  
 TGCGGGTTATTCAACCAACGGTTCGATTTAATTCTTCTACA ACTCAAACTATC  
 CATTAGTTATTGTTAATACTACTAATGATAAAAACAGCTTCGGCGACGGTCAAAC  
 TCTTTTAGGTTATCACCAGAGCGGCAAATATCACCATTATTTTCGTGGCAAAGGT  
 GTAACAAACGTTAACACCGCCGGCGGGTGTGTTGTTACTCCTGGTAACGTCTGAG  
 TCCGGGGCGGTTTCGGTTAATATTGATGGTCTCAGTAATGCTTCTACAGTGCTTTTT  
 AAAGGAAATACTACAGGATATAGTTCAGTCGATAATATAGAGCTCAAAGTTTGG  
 GGTGACACTTTTAATACGGTAGGTGGTTCCTCGTAAAAACGTAATGGAAACATCTG  
 ATGCTACTGGCTGGATGCATTATATTCAACGAACTACAGAAGGTAAAGTCGAAT  
 CCTATTTAAATGGTACCATGAATGTAATTGAAGGATTGACTGTCAATCAAGATAC  
 ATCCTTAAACGTAATCTGTATGTTTCCAATGAAATTAAGTTCGCGCTGCTAGT  
 GGTCTTCGTATTTGGAACGATAAGTATGGTGTATTTTTTCGAAATTCGGAAGACC  
 AACTGCATATTATTCCGACCAATGCCAATGCCGGCGAAAGTGGTGGATTGGGCC  
 CATTACGACCGTTAAGTATTACATTAGACACCGGCATAGTTAAAATTCCTAACTT  
 AGCAGCCAACCAGGTTTCTTTTAGTAGCACAGGTGTATTGGAATTCATCGCCGGT  
 AACGGTTCATCTTATGCTAACCAGAACACA ACTAAAGCTCCATTGTATCAAACGC  
 TTGGTTCTGCGACTCAAGCATTCTATCCTATTACTAAGCAGAAAAATACAGTTTC  
 TAACGTA ACTGTTACTCAAGGTATGGACCGAGCTACGAGCGAATACCGAATTGTT  
 GCTCAAGGTGATTTGCTTGGTGATGGTGATGCTACAGGATTGCAATACTGGCGAT  
 TTACCAAAGAAGGTAACTTTATAACTCGGAACCGCTTATATGCCGGTACAGCTTT  
 CATGAATACCGATGGCAATATTGCAGGTTCTATTTGGAACAAGTATAGCGGTGCT  
 ACTAACCTTGATGCTGCAGTGAATACTCGTGTTGGTAAAGGCGGCGATAACAATG  
 ACTGGCAAATTAATCGTTAAAAGAGGCTCTGACGCTATTAACATTGCTGCCGATG  
 AAAATGATTCTGCTTATTTACTTGGAACATCGGGTGGAAACGAATTCGTGGTACAT

CGGTAAAGGCGGAGCAGATGACACTGCTTCATTTTATAATTTCAA<sup>AA</sup>ACTACCGCA  
 GGAATTACTCTTAATAGTGTAGGCGATATTGATTTTAATGTTAAAAACAATCTA  
 CTGCAGCTTCATTA<sup>AA</sup>TTTTTATCGTTTATATTTAAACGGAAGACAGTGGACAGC  
 TACTCAAGGCCACGGATATAATAATCAATGGCAAACAGAAGCCCCATTCTTCGTT  
 GACTTTGGTGAATCTGTTCCGAAAGATAGTTATATGCCAATTATCAAAGGAAAAA  
 GCCAAATCATTAAACGAAGGATATGCCACAAAGGCAGATTTTGGTATTATTAGATT  
 GGGCGGAGATGCTACTTGGGGAAATGCAGTAATTCGTGTTGGTTCTGCGGAAAG  
 TGGAGATAGCAGTCATCCTAATGCAATATTTGTGTTTCAGGCTAATGGCGATTTT  
 AAAGCTCCGGCTGGTCTTCGCGCTGGTGTAACTTGGGTGTCGGTACAATTCCAG  
 CATGGGGCGGAGCATCTATCGCCATTGGGGACGATGACACCGGCTTGGTCCATG

GCGGTGACGGCCGAATTAATATGTATGCCAATAGTATGCATATTGCAAGCTGGG  
 GAGCTGGTTACCATATCCATGAAGGTCTTTGGGATACCACTGGTGCCTTGTGGAC  
 TGAAACAGGAAGAGCTATTATTTCTTTTGGTCATTTAGTCCAACAAAACGATAGC  
 TATTCAACATTTGTTCTGTGACGTTTATGTTCTGCTCTGATATTCGTGTTAAAAAGA  
 CCTTGTTAAATTTGAAAATGCTTCACAGACACTTTCAA<sup>AA</sup>AATTAACGGTTACT  
 TATATGCAGAAACGTGGCCTGGATGAAGAAGGTAATCAGAAATGGGAACCTAAT  
 GCCGGTTTAATTGCTCAAGAAGTTCAAGCTATTTACCTGAATTGGTTGAAGGCG  
 ACCCTGACGGTGAAGCTTTACTTCGTTTAAACTATAACGGTGAATTGGTTTAAA  
 TACAGCTGCAATCAATGAGCACACTGCAGAAATAGCAGAATTGAAATCAGAGAT  
 TGAAGA<sup>AA</sup>CTTAAAGCACTAATTAATCATTGTTAA<sup>AA</sup>ATAA

### WGqlbe

ATGGCTACTTTAAAGCAAATCCAATTTAAAGAAGTAAAGTAGCCGGTGTACGT  
 CCGGCACCGGCCAGTTGGCTGAAGGCGAACTGGCTATTA<sup>AA</sup>CTTAAAGGACCGT  
 TTA<sup>CT</sup>TTTTACTAAAGACGATACTGGAGCGATTATCGACCTTGGCTTTGCTAAGG  
 GTGGAAATATCGATGGTAATGTTATTCATAAAGGCAATTACAACCAAACCGGCG  
 ATTATACACTTAATGGTGTATTTACTCAAATTGGTGATTTCAATCTCAATGGTATT  
 GCTCGTGTA<sup>AA</sup>CTCGTGACATTATTGCCGCTGGCCAGATAATGACCGAAGGCGGC  
 GAGCTTATTTCTAAGAGCGCCTCA<sup>AA</sup>CTTCTCACCTTCGTTTCTTTGATGGTGTATGA  
 TCGTGAACGTGGTATTATCTTTTCTCAAATAATGCGGGTCTTACCAATCAAGTA  
 GTTAATATTCGCGTCCAAGATTACGCTGCAGGAAGTGAAAGCACCTACGCGTTTT  
 CAGGCAATGGTGTATTTTCTTCACCAGAAGTTTTTGGGTGGAAATCTGTATCAAC  
 TCCGGTAATTTATACCAATAAAGTTATTACTAATAAAAAGGTTAAAGGTGATTAT  
 GACATCTATTCGTTGGCTGACAACACTCCATTTGAAGAAGGCGAAACGGCTATTA  
 ACCACCTCCGTGTTATGCGAAATGCTGTAGGAGCAGGTATTTTCCACGAAGTTAA  
 TGTTAATGACGGAATAACCTGGTATTCGGGAGATGGCTTAGACACTTATCTTTGG  
 TCGTTTAACTGGGCCGGTGGATTGAAAGCCGGTCATTCTATTTCTGTAGGTCTTCC  
 AGGTGGTTCTAAAGGATATTCTGAATTAGGAACTGCATCAATTGCTCTTGGTGTAT  
 AATGACACCGGGTTAA<sup>AA</sup>ATGGCACCAAGATGGTATTTCTTTAGTGTAACAACG  
 GCACAAGA<sup>AA</sup>CTTCTGAGCGGCCCTGCAGAA<sup>AA</sup>CCACCAGTCTTAGAAAAATGG  
 TTATGGGTTATTCTGTAAACGGTACCGATTTAA<sup>AA</sup>CCACTCCTCCGTCGGAA<sup>AA</sup>ACTA  
 TGCTTTGGCGACGGTTGTC<sup>AA</sup>CTTATCATGATAATAACGCGTATGGCGACGGTCAA

ACTCTTTTAGGTTATTATCAAGGTGGCAATTATCACCCTATTTCCGTGGTAAAG  
GTACTACAAACGTTAACACCGCTGGTGGTTTGTAGTTACTCCGGGTAATATTGA  
TGTTGTTGGCGGTTCCGGTTAATATTGATGGTCTCAGTAATGCTTCTACAGTGCTTT  
TTAAAGGAAATACTACAGGATATAGTTCAGTCGATAATATAGAGCTCAAAGTTTG  
GGGTGACACTTTTAATACGGTAGGTGGTTCTCGTAAAAACGTAATGGAAACATCT  
GATGCTACTGGCTGGATGCATTATATTCAACGAACTACAGAAGGTAAAGTCGAA  
TCCTATTTAAATGGTACCATGAATGTAATTGAAGGATTGACTGTCAATCAAGATA  
CATCCTTAAAACGTAATCTGTATGTTTCCAATGAAATTAAGTTCCGCGCTGCTAG  
TGGTCTTCGTATTTGGAACGATAAGTATGGTGTATTTTTTCGAAATTCGGAAGAC  
CAACTGCATATTATTCCGACCAATGCCAATGCCGGCGAAAGTGGTGGATTGGGC  
CCATTACGACCGTTAAGTATTACATTAGACACCGGCATAGTTAAAATTCCTAACT  
TAGCAGCCAACCAGGTTTCTTTTAGTAGCACAGGTGTATTGGAATTCATCGCCGG  
TAACGGTTCATCTTATGCTAACCCAGAACACAATAAGCTCCATTGTATCAAACG  
CTTGGTCTGCGACTCAAGCATTCTATCCTATTACTAAGCAGAAAAATACAGTTT  
CTAACGTAACTGTTACTCAAGGTATGGACCGAGCTACGAGCGAATACCGAATTG  
TTGCTCAAGGTGATTTGCTTGGTGTATGGTGTATGCTACAGGATTGCAATACTGGCG  
ATTTACCAAAGAAGGTAACCTTTATAACTCGGAACCGCTTATATGCCGGTACAGCT  
TTCATGAATACCGATGGTAATATTGCAGGTTCTATTTGGAACAAGTATAGCGGTG  
CTACTAACCTTGATGCTGCAGTGAATACTCGTGTTGGTAAAGGCGGCGATACAAT  
GACTGGCAAATTAATCGTTAAAAGAGGCTCTGACGCTATTAACATTGCTGCCGAT  
GAAAATGATTCTGCTTATTTACTTGGAACATCGGGTGGAGCGAATTCGTGGTACA  
TCGGTAAAGGCGGAGCAGATGACACTGCTTCATTTTATAATTTCAAAACTACCGC  
AGGAATTACTCTTAATAGTGTAGGCGATATTGATTTTAATGTTAAAAACAATCT  
ACTGCAGCTTCATTAATTTTTATCGTTTATATTTAAACGGAAGACAGTGGACAG  
CTACTCAAGGCCACGGATATAATAATCAATGGCAAACAGAAGCCCCATTCTTCGT  
TGACTTTGGTGAATCTGTTCCGAAAGATAGTTATATGCCAATTATCAAAGGAAAA  
AGCCAAATCATTAAACGAAGGATATGCCACAAAGGCAGATTTTGGTATTATTAGAT  
TGGGCGGAGATGCTACTTGGGGAAATGCAGTAATTCGTGTTGGTTCTGCGGAAA  
GTGGAGATAGCAGTCATCCTAATGCAATATTTGTGTTTCAGGCTAATGGCGATTT  
TAAAGCTCCGGCTGGTCTTCGCGCTGGTGTAACTTGGGTGTCCGTACAATTCCA  
GCATGGGGCGGAGCATCTATCGCCATTGGGGACGATGACACCGGCTTGGTCCAT  
GGTGGTGACGGCCGAATTAATATGTATGCCAATAGTATGCATATTGCAAGCTGGG  
GAGCCGGTTACCATATCCATGAAGGTCTTTGGGATACCACTGGTGCCTTGTGGAC  
TGAAACAGGAAGAGCTATTATTTCTTTTGGTCAATTTAGTCCAACAAAACGATAGC  
TATCAACATTTGTTTCGTGACGTTTATGTTTCGTTCTGATATTCGTGTTAAAAAGA  
CCTTGTTAAATTTGAAAATGCTTCACAGACACTTTCAAAAATTAACGGTTACACT  
TATATGCAGAAACGTGGCCTGGATGAAGAAGGTAATCAGAAATGGGAACCTAAT  
GCCGTTTAAATTGCTCAAGAAGTTCAAGCTATTTTACCTGAATTGGTTGAAGGCG  
ACCCTGACGGTGAAGCTTTACTTCGTTTAACTATAACGGTGTAAATTGGTTTAAA  
TACAGCTGCAATCAATGAGCACACTGCAGAAATAGCAGAATTGAAATCAGAGAT  
TGAAGAACTTAAAGCACTAATTAATCATTGTTAAATAA

WGqlce

ATGGCTACTTTAAAGCAAATCCAATTTAAAAGAAGTAAAGTAGCCGGTGTACGT  
CCGGCACCGGCCAGTTGGCTGAAGGCGAACTGGCTATTA ACTTAAAGGACCGT  
TTACTTTTTACTAAAGACGATACTGGAGCGATTATCGACCTTGGCTTTGCTAAGG  
GTGGAATATCGATGGTAATGTTATTCATAAAGGCAATTACAACCAAACCGGCG  
ATTATACACTTAATGGTGTATTTACTCAAATTGGTGATTTCAATCTCAATGGTATT  
GCTCGTGTA ACTCGTGACATTATTGCCGCTGGCCAGATAATGACCGAAGGCGGC  
GAGCTTATTTCTAAGAGCGCCTCAACTTCTCACCTTCGTTTCTTTGATGGTGATGA  
TCGTGAACGTGGTATTATCTTTTCTCCAAATAATGCCGGTCTTACCAATCAAGTA  
GTTAATATTCGCGTCCAAGATTACGCTGCAGGAAGTGAAAGCACCTACGCGTTTT  
CAGGCAATGGTGTATTTTCTTCACCAGAAGTTTTTTGGGTGGAAATCTGTATCAAC  
TCCGGTAATTTATACCAATAAAGTTATTACTAATAAAAAGGTAAAGGTGATTAT  
GACATCTATTCGTTGGCTGACAACACTCCATTTGAAGAAGGCGAAACGGCTATTA  
ACCACCTCCGTGTTATGCGAAATGCTGTAGGAGCAGGTATTTTCCACGAAGTTAA  
TGTTAATGACGGAATAACCTGGTATTCGGGAGATGGCTTAGACACTTATCTTTGG  
TCGTTTAACTGGGCCGGTGGATTGAAAGCCGGTCATTCTATTTCTGTAGGTCTTCC  
AGGTGGTTCTAAAGGATATTCTGAATTAGGAACTGCATCAATTGCTCTTGGTGAT  
AATGACACCGGGTTAAAATGGCACCAAGATGGTTATTTCTTTAGTGTAACAACG  
GCACAAGA ACTTTCCTGAGCGGCCCTGCAGAAACCACCAGTCTTAGAAAAATGG  
TTATGGGTATTCTGTAAACGGTACCGATTTAACC ACTCCTCCGTCCGAAA ACTA  
TGCTTTGGCGACGGTTGCTACTTATCATGATAATAACGCGTATGGCGACGGTCAA  
ACTCTTTTAGGTTATTATCAAGGTGGCAATTATCACCACTATTTCCGTGGTAAAG  
GTACTACAAACGTTAACACCGCTGGTGGTTTTGTTAGTTACTCCGGGTAACGTTGA  
AGTCCGGGGCGGTTCCGGTTAATATTGATGGTCTCAGTAATGCTTCTACAGTGCTT  
TTTAAAGGAAATACTACAGGATATAGTTCAGTCGATAATATAGAGCTCAAAGTTT  
GGGGTGACACTTTTAAATACGGTAGGTGGTTCTCGTAAAAACGTAATGGAAACATC  
TGATGCTACTGGCTGGATGCATTATATTCAACGAACTACAGAAGGTAAAGTCGA  
ATCCTATTTAAATGGTACCATGAATGTAATTGAAGGATTGACTGTCAATCAAGAT  
ACATCCTTAAAACGTAATCTGTATGTTTCCAATGAAATTAAGTTTCGCGCTGCTA  
GTGGTCTTCGTATTTGGAACGATAAGTATGGTGTATTTTTTCGAAATTCGGAAGA  
CCAACTGCATATTATTCGACCAATGCCAATGCCGGCGAAAGTGGTGGATTGGG  
CCCATTACGACCGTTAAGTATTACATTAGACACCGGCATAGTTAAAATTCCTAAC  
TTAGCAGCCAACCAGGTTTCTTTTAGTAGCACAGGTGTATTGGAATTCATCGCCG  
GTAACGGTTCATCTTATGCTAACCAGAACA CACTAAAGCTCCATTGTATCAAAC  
GCTTGGTTCTGCGACTCAAGCATTCTATCCTATTACTAAGCAGAAAAATACAGTT  
TCTAACGTA ACTGTTACTCAAGGTATGGACCGAGCTACGAGCGAATACCGAATT  
GTTGCTCAAGGTGATTTGCTTGGTGATGGTGATGCTACAGGATTGCAATACTGGC  
GATTTACCAAAGAAGGTA ACTTTATAACTCGGAACCGCTTATATGCCGGTACAGC  
TTTCATGAATACCGATGGTAATATTGCAGGTTCTATTTGGAACAAGTATAGCGGT  
GCTACTAACCTTGATGCTGCAGTGAATACTCGTGTTGGTAAAGGCGGCGATACAA  
TGACTGGCAAATTAATCGTTAAAAGAGGCTCTGACGCTATTAACATTGCTGCCGA  
TGAAAATGATTCTGCTTATTTACTTGGAACATCGGGTGGAGCGAATTCGTGGTAC  
ATCGGTAAAGGCGGAGCAGATGACACTGCTTCATTTTATAATTTCAA AACTACCG  
CAGGAATTA CTCTTAATAGTGTAGGCGATATTGATTTTAAATGTTAAAAACAATC  
TACTGCAGCTTCATTA AATTTTTATCGTTTATATTTAAACGGAAGACAGTGGACA  
GCTACTCAAGGCCACGGATATAATAATCAATGGCAAACAGAAGCCCCATTCTTC



GTTGACTTTGGTGAATCTGTTCCGAAAGATAGTTATATGCCAATTATCAAAGGAA  
AAAGCCAAATCATTAAACGAAGGATATGCCACAAAGGCAGATTTTGGTATTATTA  
GATTGGGCGGAGATGCTACTTGGGGAAAATGCAGTAATTCGTGTTGGTTCTGCGGA  
AAGTGGAGATAGCAGTCATCCTAATGCAATATTTGTGTTTCAGGCTAATGGCGAT  
TTTAAAGCTCCGGCTGGTCTTCGCGCTGGTGTAACTTGGGTGTCGGTACAATTC  
CAGCATGGGGCGGAGCATCTATCGCCATTGGGGACGATGACACCGGCTTGGTCC  
ATGGCGGTGACGGCCGAATTAATATGTATGCCAATAGTATGCATATTGCAAGCTG  
GGGAGCTGGTTACCATATCCATGAAGGTCTTTGGGATACCACTGGTGCCTTGTGG  
ACTGAAACAGGAAGAGCTATTATTTCTTTTGGTCAATTAAGTCCAACAAAACGATA  
GCTATTCAACATTTGTTTCGTGACGTTTATGTTTCGTTCTGATATTCGTGTTAAAAA  
GACCTTGTTAAATTTGAAAATGCTTCACAGACACTTTCAAAAATTAACGGTTACA  
CTTATATGCAGAAACGTGGCCTGGATGAAGAAGGTAATCAGAAATGGGAACCTA  
ATGCCGGTTTAAATTGCTCAAGAAGTTCAAGCTATTTTACCTGAATTGGTTGAAGG  
CGACCTGACGGTGAAGCTTACTTCGTTTAACTATAACGGTGTAATTGGTTTA  
AATACAGCTGCAATCAATGAGCACACTGCAGAAATAGCAGAATTGAAATCAGAG  
ATTGAAGAACTTAAAGCACTAATTAATCATTGTTAAAATAA

### WGqldc

ATGGCTACTTTAAAGCAAATCCAATTTAAAAGAAGTAAAGTAGCCGGTGTACGT  
CCGGCACCGGCCAGTTGGCTGAAGGCGAACTGGCTATTAAGTAAAGGACCGT  
TACTTTTTACTAAAGACGATACTGGAGCGATTATCGACCTTGGCTTTGCTAAGG  
GTGGAAATATCGATGGTAATGTTATTCATAAAGGCAATTACAACCAAACCGGCG  
ATTATACACTTAATGGTGTATTTACTCAAATTTGGTGATTTCAATCTCAATGGTATT  
GCTCGTGTAAGTTCGTGACATTATTGCCGCTGGCCAGATAATGACCGAAGGCGGC  
GAGCTTATTTCTAAGAGCGCCTCAACTTCTCACCTTCGTTTCTTTGATGGTGATGA  
TCGTGAACGTGGTATTATCTTTTCTCAAATAATGCGGGTCTTACCAATCAAGTA  
GTTAATATTCGCGTCCAAGATTACGCTGCAGGAAGTGAAAGCACCTACGCGTTTT  
CAGGCAATGGTGTATTTTCTTACCAGAAGTTTTTTGGGTGGAAATCTGTATCAAC  
TCCGGTAATTTATACCAATAAAGTTATTAATAAAAAGGTTAAAGGTGATTAT  
GACATCTATTCGTTGGCTGACAACACTCCATTTGAAGAAGGCGAAACGGCTATTA  
ACCACCTCCGTGTTATGCGAAATGCTGTAGGAGCAGGTATTTTCCACGAAGTTAA  
TGTTAATGACGGAATAACCTGGTATTCCGGAGATGGCTTAGACACTTATCTTTGG  
TCGTTTAACTGGGCCGGTGGATTGAAAGCCGGTCATTCTATTTCTGTAGGTCTTCC  
AGGTGGTTCTAAAGGATATTCTGAATTAGGAAGTGCATCAATTGCTCTTGGTGAT  
AATGACACCGGGTTAAAATGGCACCAAGATGGTTATTTCTTTAGTGTAACAACG  
GCACAAGAAGTCTTCTGAGCGGCCCTGCAGAAACCACAGTCTTAGAAAAATGG  
TTATGGGTTATTCTGTAAACGGTACCGATTAAACCACTCCTCCGTCCGAAAACCTA  
TGCTTTGGCGACGGTTGTCATTATCATGATAATAACGCGTATGGCGACGGTCAA  
ACTCTTTTAGGTTATTATCAAGGTGGCAATTATCACCACTATTTCCGTGGTAAAG  
GTACTACAAACGTTAACACCGCTGGTGGTTTGTAGTTACTCCGGGTAATATTGA  
TGTTGTTGGCGGTTCCGGTTAATATTGATGGCCGCAACAATGCTTCTACACTAATG  
TTCAGAGGAAATACTACAGGAAGTAGTTCAGTTGATAATATGACTATCGCCGTTT  
GGGGTAATACCTTTACTAATGTTGATGGTGACCGTAAAAACGTAATGGAAATATC

TGATGCCACTAGTTGGATGTGGTATATTCAGCGCAAAACCGATGACAAAGTTGA  
AGCCCATTTAAACGGTGCCTTACGTGTAATGGAAGCATCGACGTCGGCAGAGA  
AGTTAACGTCTCCGGCACTATTGCTGGTAATGCGGTCAATGCTCTTAGAATTTGG  
AACGACGACTACGGTGCCATTTCCGCCGTTCCGAAGGAAGTCTTCATATTATTC  
CTACCGCCTTTGGCGAAGGTAAAACCTGGTGATATCGGACCACTTCGTCCATTTAG  
TTTGGCATTAGATACCGGCATAGTTAAAATTCCTAACTTAGCAGCCAACCAGGTT  
TCTTTTAGTAGCACAGGTGTATTGGAATTCATCGCCGGTAACGGTTCATCTTATGC  
TAACCAGAACACAACATAAAGCTCCATTGTATCAAACGCTTGGTTCTGCGACTCAA  
GCATTCTATCCTATTACTAAGCAGAAAAATACAGTTTCTAACGTAACCTGTTACTC  
AAGGTATGGACCGAGCTACGAGCGAATACCGAATTGTTGCTCAAGGTGATTTGC  
TTGGTGATGGTGATGCTACAGGATTGCAATACTGGCGATTTACCAAAGAAGGTA  
ACTTTATAACTCGGAACCGCTTATATGCCGGTACAGCTTTCATGAATACCGATGG  
TAATATTGCAGGTTCTATTTGGAACAAGTATAGCGGTGCTACTAACCTTGATGCT  
GCAGTGAATACTCGTGTTGGTAAAGGCGGCGATAACAATGACTGGCAAATTAATC  
GTTAAAAGAGGCTCTGACGCTATTAACATTGCTGCCGATGAAAATGATTCTGCTT  
ATTTACTTGGAAACATCGGGTGGAGCGAATTCGTGGTACATCGGTAAGGCGGAG  
CAGATGACACTGCTTCATTTTATAATTTCAAAACTACCGCAGGAATTACTCTTAA  
TAGTGTAGGCGATATTGATTTTAATGTTAAAAAACAGTCTACTGCAGCTTCATTA  
AATTTTTATCGTTTATATTTAAACGGAAGACAGTGGACAGCTACTCAAGGCCACG  
GATATAATAATCAATGGCAAACAGAAGCCCCATTCTTCGTTGACTTTGGTGAATC  
TGTTCCGAAAGATAGTTATATGCCAATTATCAAAGGAAAAAGCCAAATCATTAA  
CGAAGGATATGCCACAAAGGCAGATTTTGGTATTATTAGATTGGGCGGAGATGC  
TACTTGGGGAAATGCAGTAATTCGTGTTGGTTCTGCGGAAAGTGGAGGTAGCAGT  
CATCCTAATGCAATATTTGTGTTTCAGGCTAATGGCGATTTTAAAGCTCCGGCTG  
GTCTTCGCGCTGGTGTAACTTGGGTGTCGGTACAATTCCAGCATGGGGCGGAGC  
ATCTATCGCCATTGGGGACGATGACACCGGCTTGGTCCATGGCGGTGACGGCCG  
AATTAATATGTATGCCAATAGTATGCATATTGCAAGCTGGGGAGCCGGTTACCAT  
ATCCATGAAGGTCTTTGGGATACCACTGGTGCCTTGTGGACTGAAACAGGAAGA  
GCTATTATTTCTTTTGGTCATTTAGTCCAACAAAACGATAGCTATTCAACATTTGT  
TCGTGACGTTTATGTTTCGTTCTGATATTCGTGTTAAAAAAGACCTTGTTAAATTTG  
AAAATGCTTCACAGACACTTTCAAAAATTAACGGTTACACTTATATGCAGAAACG  
TGGCCTGGATGAAGAAGGTAATCAGAAATGGGAACCTAATGCCGGTTTAATTGC  
TCAAGAAGTTCAAGCTATTTTACCTGAATTGGTTGAAGGCGACCCTGACGGTGAA  
GCTTTACTTCGTTTAAACTATAACGGTGTAATTGGTTTAAATACAGCTGCAATCA  
ATGAGCACACTGCAGAAATAGCAGAATTGAAATCAGAGATTGAAGA ACTTAAAG  
CACTAATTAATCATTGTTAAAATAA
